# Supplementary material
Source: Springer Nature journal article supplement (https://www.springermedizin.de/resource/supplementary/12875_2006_225_MOESM1_ESM.pdf/9436542)

Number of PHCRED funding holders (n=38)

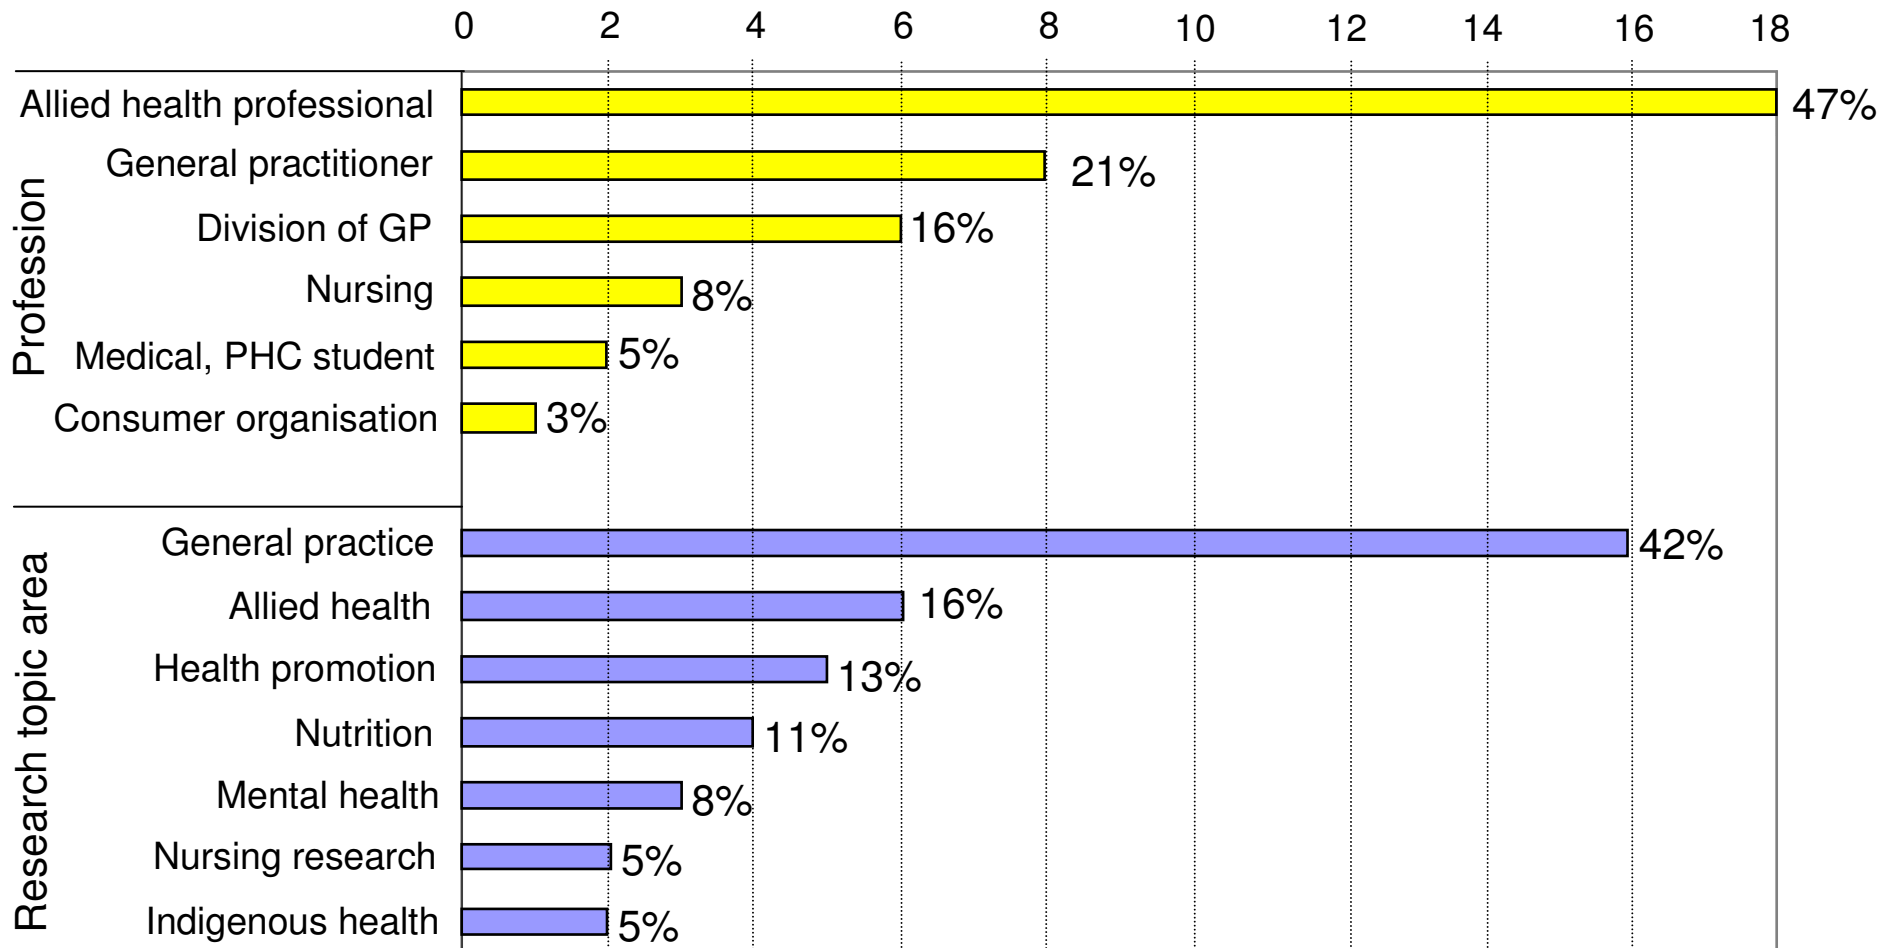

Supplement: MOESM1 [file 9436542]
